# Supplementary material
Source: PubMed Central journal article supplement (PMC10548176)
Supplement: EMBJ-42-e112814-s022.pdf [file EMBJ-42-e112814-s022.pdf]

## Expanded View Figures

**Figure EV1. (corresponding to Fig 1). Ypt1 binds directly to Atg1, Hrr25, Atg11, or Atg17 *in vitro*.**

A–D Ni-NTA pulldowns were performed by using purified His<sub>6</sub>-tagged TF-Atg1, Atg17, Hrr25, Atg11 CC1(2–321aa), CC2(322–576aa), CC3(577–858aa), or CC4(859–1178aa) with GST or GST-Ypt1 from *E. coli*. Protein samples were separated by SDS-PAGE, and then detected using Coomassie blue staining.

Source data are available online for this figure.

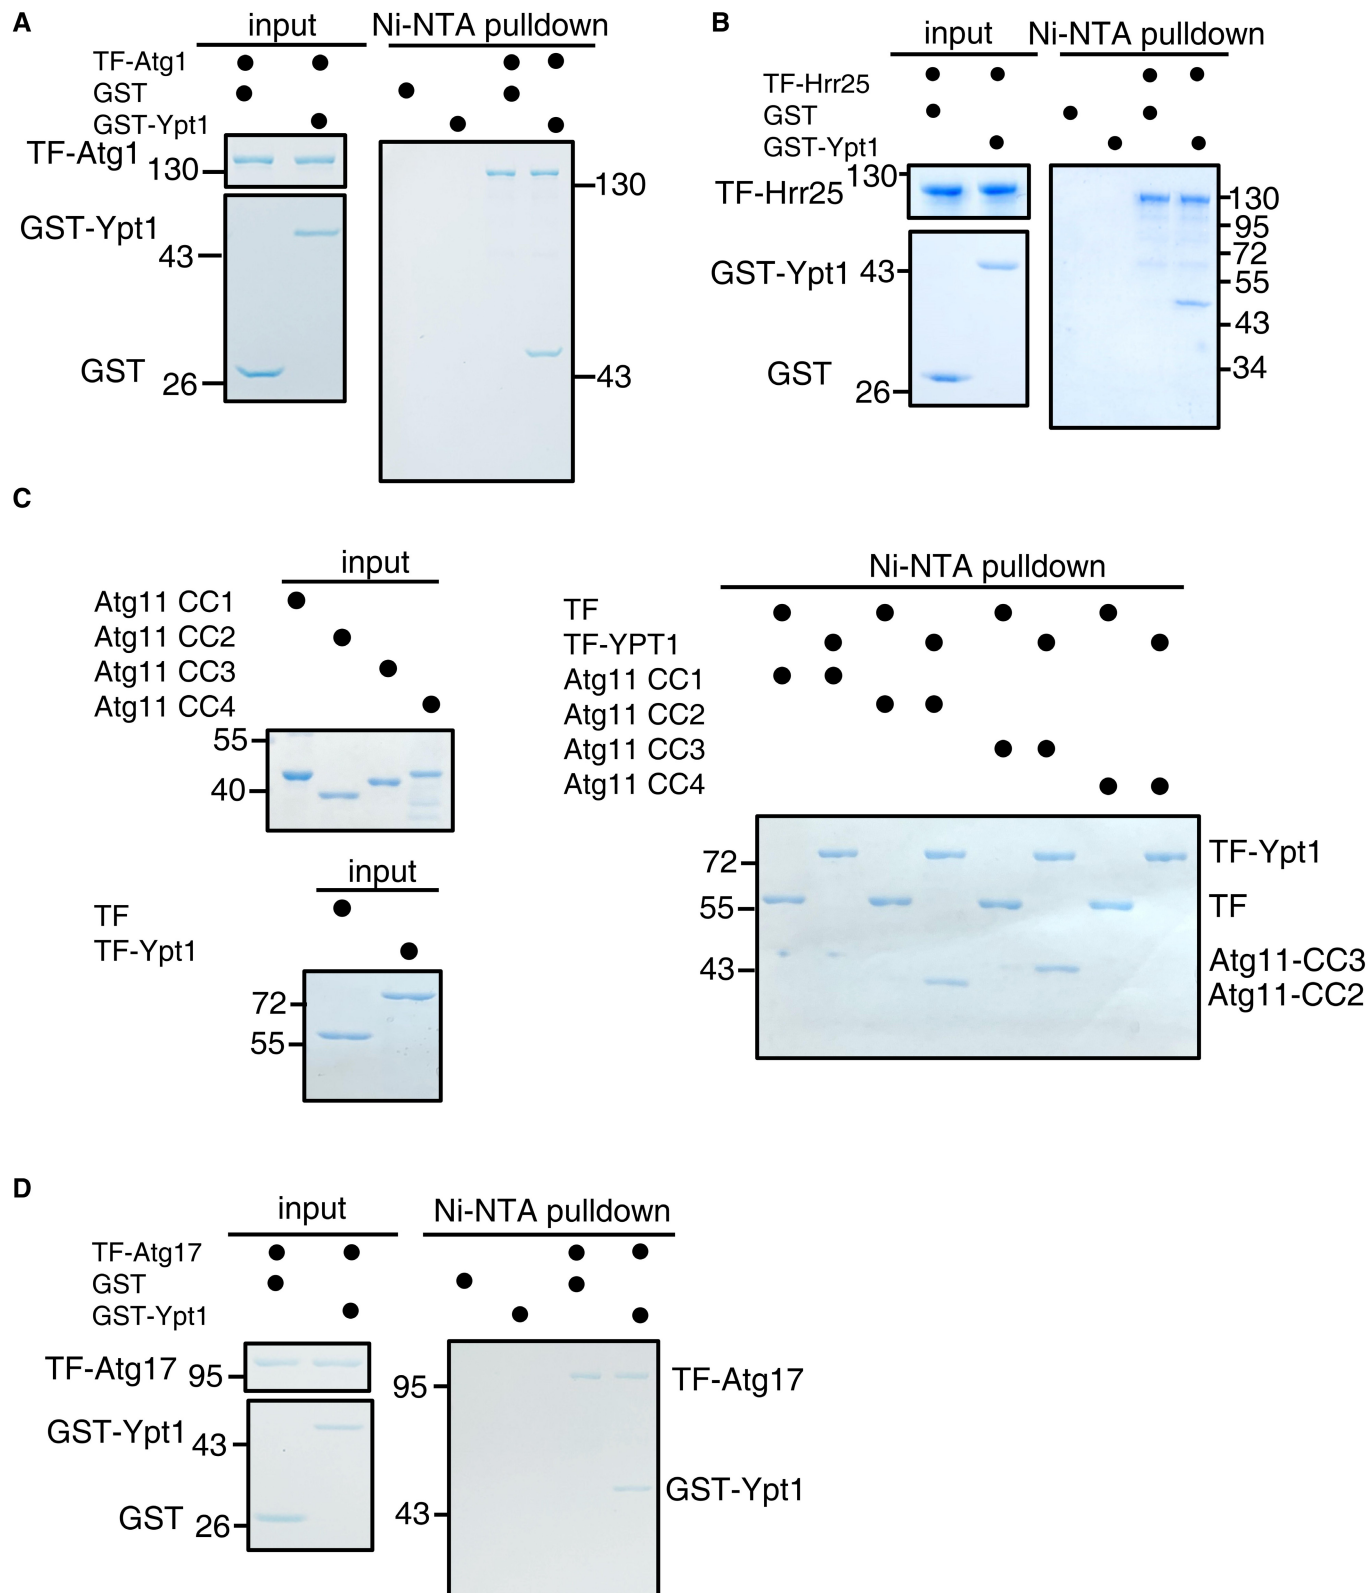

Figure EV1.

**Figure EV2. (corresponding to Fig 2). The Atg23 CC1 domain is required for Ypt1-Atg23 binding and Atg23<sup>L170N-L171N-L173N</sup> and Atg23<sup>L188N-L189N</sup> mutants impaired the dimerization of Atg23 and its binding with Atg9.**

- A–C Fluorescence microscopy images of wild-type cells expressing the BiFC constructs VC-Ypt1 and Atg23-VN or the indicated Atg23-VN variants cultured in nitrogen starvation for 1 h. Scale bar: 2  $\mu$ m.
- D The maturation of PrApe1 from Fig 2G were quantified by the ratio of Ape1/Ape1 + PrApe1 and presented as mean  $\pm$  SD ( $n = 3$ ). \*\*\* $P < 0.001$ ; NS, no significance; two-tailed Student's  $t$ -tests were used.
- E The AH109 strain was transformed with plasmids expressing BD-fused with Atg23 and plasmids expressing AD-fused with Atg23, Atg23<sup>L170N-L171N-L173N</sup>, or Atg23<sup>L188N-L189N</sup>. These strains were grown on SD-Leu-Trp or SD-His-Leu-Trp (3-AT) agar plates at 30°C for 3 days.
- F Atg9-TAP (Tandem Affinity Purification tag, CBP-TEV-PA) and Atg23-3 $\times$ HA, Atg23<sup>L170N-L171N-L173N</sup>-3 $\times$ HA, or Atg23<sup>L188N-L189N</sup>-3 $\times$ HA were co-expressed in *atg23 $\Delta$*  yeast strains. Cells were grown to the log-growth phase and then subjected to nitrogen starvation for 1 h. Cell lysates were immunoprecipitated with anti-Rabbit IgG agarose beads and then analyzed with anti-HA antibody.
- G GST pulldowns were performed using purified His<sub>6</sub>-tagged TF-Atg9 N (2–318aa), or TF-Atg9 C (747–997aa) with GST, GST-Atg23, GST-Atg23<sup>L170N-L171N-L173N</sup>, or GST-Atg23<sup>L188N-L189N</sup> from *E. coli*. Protein samples were separated by SDS-PAGE, and then detected using Coomassie blue staining.
- H Fluorescence microscopy images of wild-type cells expressing the BiFC constructs Atg23-VC and Atg23-VN or the indicated Atg23-VN variants cultured in nitrogen starvation for 1 h. Scale bar: 2  $\mu$ m.

Source data are available online for this figure.

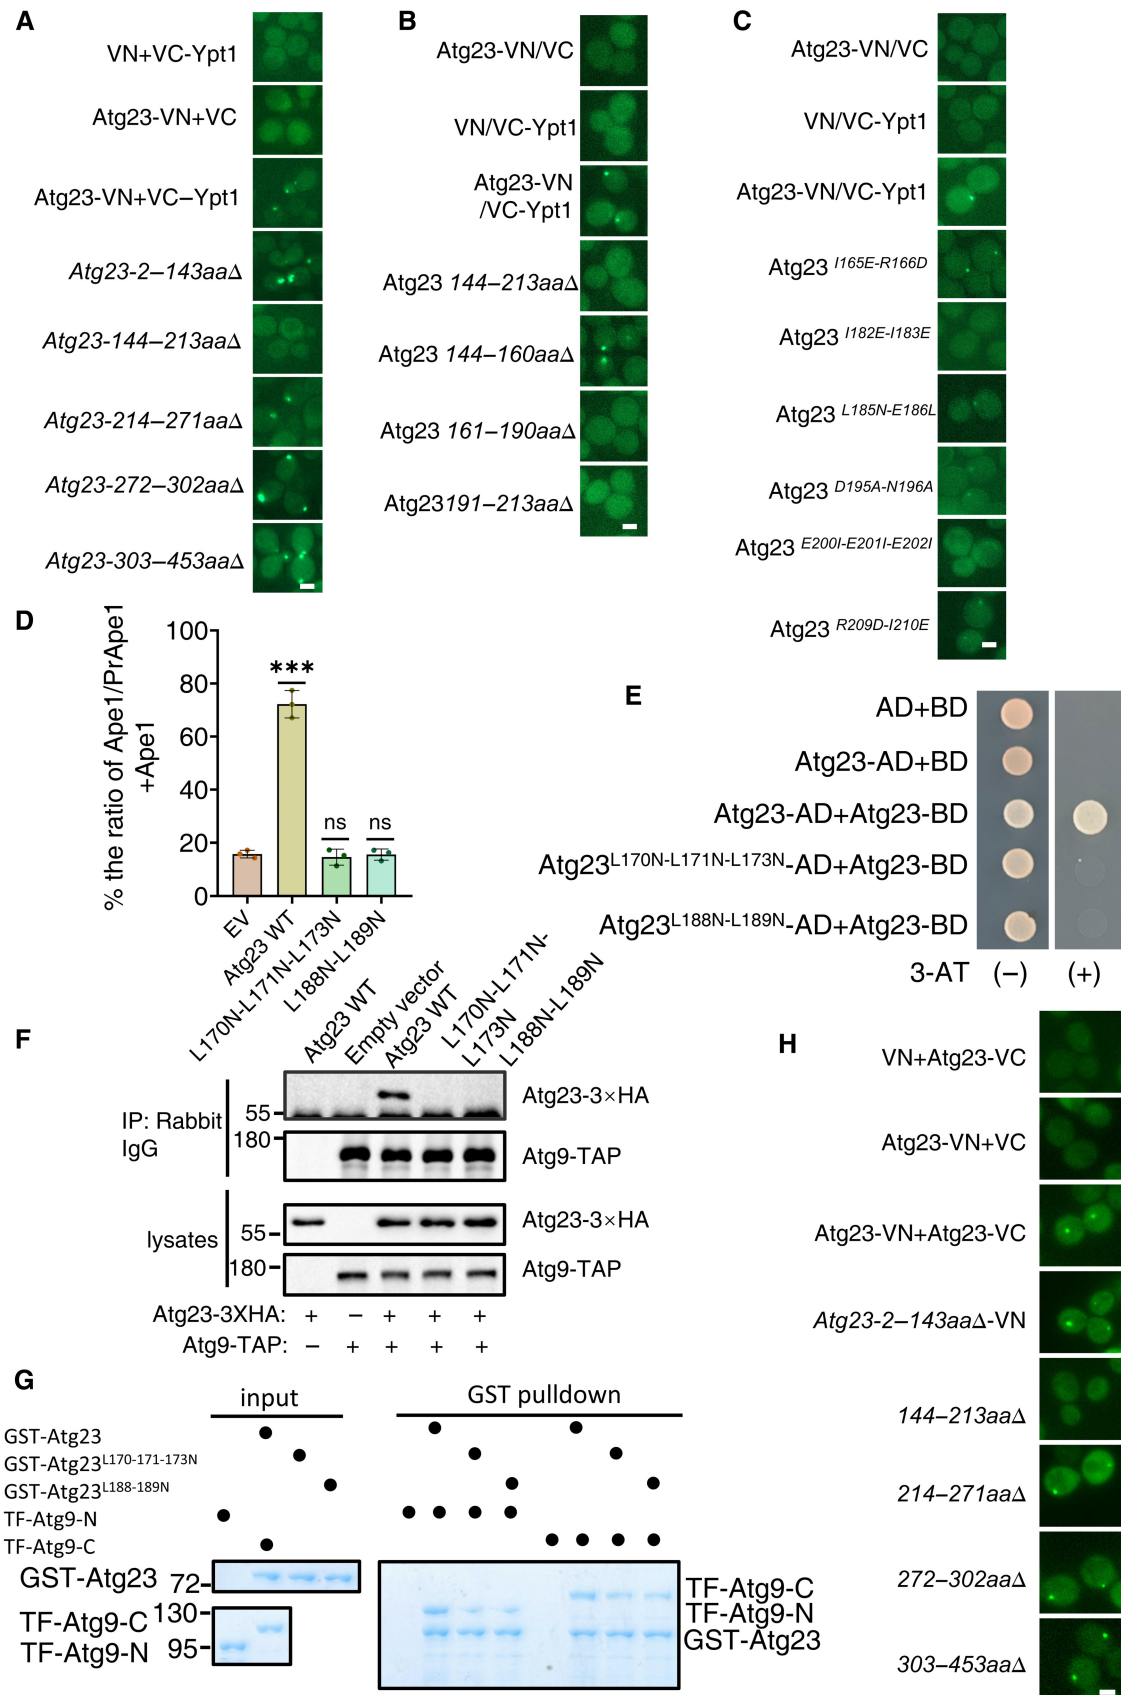

Figure EV2.

**Figure EV3. (corresponding to Fig 5). Ypt1 binds directly with Atg17.**

- A Fluorescence microscopy images of wild-type cells expressing the BiFC VC-Ypt1 and Atg17-VN, cultured in nutrient-rich medium. Scale bar: 2  $\mu$ m.
- B Atg17-3 $\times$ FLAG and HA-Ypt1 were co-expressed in wild-type yeast strains. Cells were grown to the log-growth phase. Cell lysates were immunoprecipitated with anti-FLAG agarose beads and then analyzed with anti-HA antibody.
- C GST pulldowns were performed using purified His<sub>6</sub>-tagged TF-Atg17 with GST, GST-Ypt1<sup>S22N</sup>, or Ypt1<sup>Q67L</sup> from *E. coli*. Protein samples were separated by SDS-PAGE, and then detected using Coomassie blue staining.
- D, E Fluorescence microscopy images of wild-type cells expressing the BiFC VC-Ypt1 and the indicated Atg17-VN variants, cultured in nutrient-rich medium. Scale bar: 2  $\mu$ m.
- F Atg29-TAP, Atg31-GFP and Atg17-2 $\times$ GFP, Atg17<sup>L286N-V290N</sup>-2 $\times$ GFP, or Atg17<sup>I293E-I294E</sup>-2 $\times$ GFP were co-expressed in *atg17* $\Delta$  yeast strains. Cells were grown to the log-growth phase. Cell lysates were immunoprecipitated with anti-Rabbit IgG agarose beads and then analyzed with anti-GFP antibody.
- G Fluorescence microscopy images of *atg17* $\Delta$  cells co-expressing the RFP-Ape1 and Atg17-2 $\times$ GFP, Atg17<sup>L286N-V290N</sup>-2 $\times$ GFP, or Atg17<sup>I293E-I294E</sup>-2 $\times$ GFP, cultured in nutrient-rich medium. Scale bar: 2  $\mu$ m.

Source data are available online for this figure.

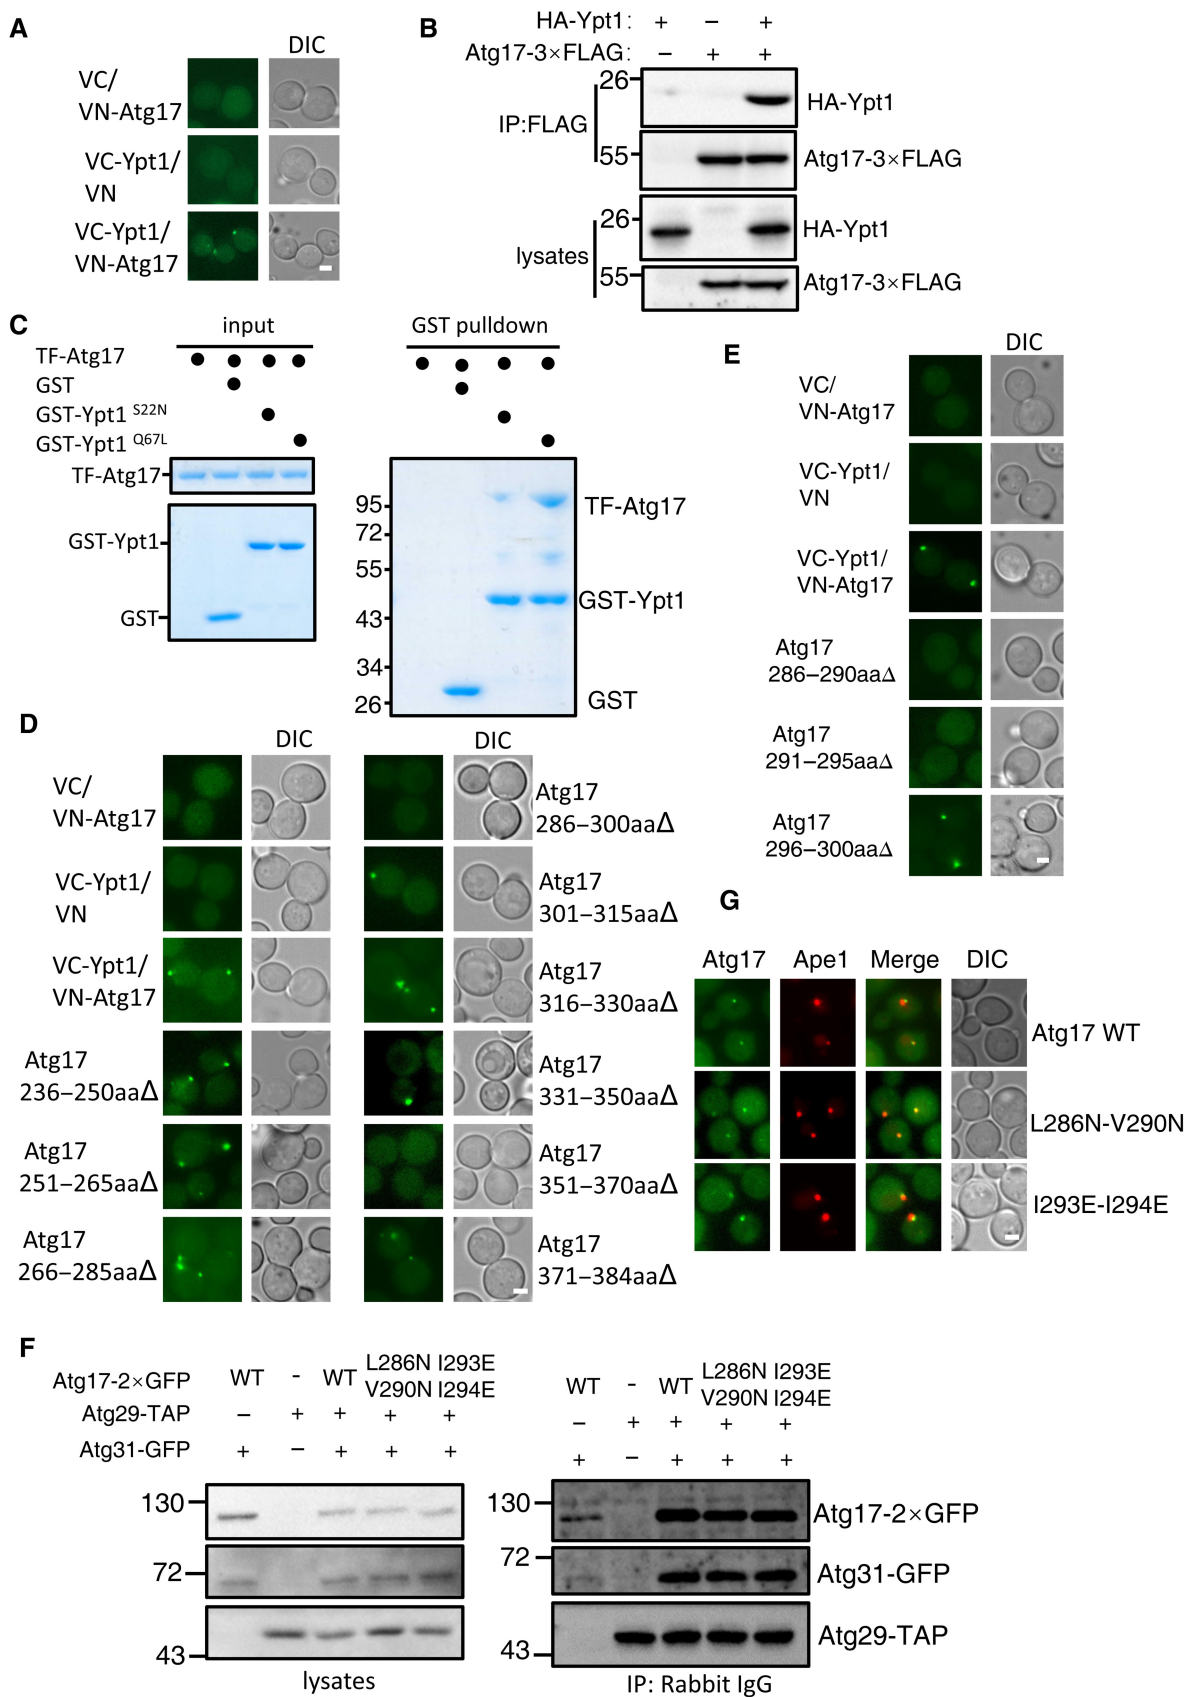

Figure EV3.

**Figure EV4. (corresponding to Fig 7). The phosphorylation of Ypt1 S174 by TOR negatively regulates autophagy.**

A–D (A, C) AID-3×HA-Ypt1 yeast strains co-expressing GFP-Atg8 and Vph1-mCherry were transformed into empty vector, FLAG-Ypt1, FLAG-Ypt1<sup>S174A</sup>, or FLAG-Ypt1<sup>S174D</sup> plasmids. These yeast strains were grown to early log phase, IAA was then added to induce the degradation of AID-3×HA-Ypt1 for 2 h. These yeast cells were then subjected to rapamycin treatment for 1 or 4 h. The autophagic activity of cells were analyzed by western blot for the cleavage of GFP-Atg8. Pgk1 served as a loading control. (B, D) The cleavage of GFP-Atg8 from (A, C) were quantified and presented as mean ± SD ( $n = 3$ ). \*\*\* $P < 0.001$ ; \*\* $P < 0.01$ ; NS, no significance; two-tailed Student's  $t$ -tests were used.

E AID-3×HA-Ypt1 ALP yeast strain transformed with FLAG-Ypt1, FLAG-Ypt1<sup>S174D</sup>, Ypt1<sup>S174A</sup>, or empty vector were grown to  $OD_{600} = 0.6 \sim 0.8$ . After treatment with 0.5 mM IAA for 2 h, the cells were subjected to nitrogen starvation for the indicated timepoints. Autophagy activity was tested by ALP assay.

Source data are available online for this figure.

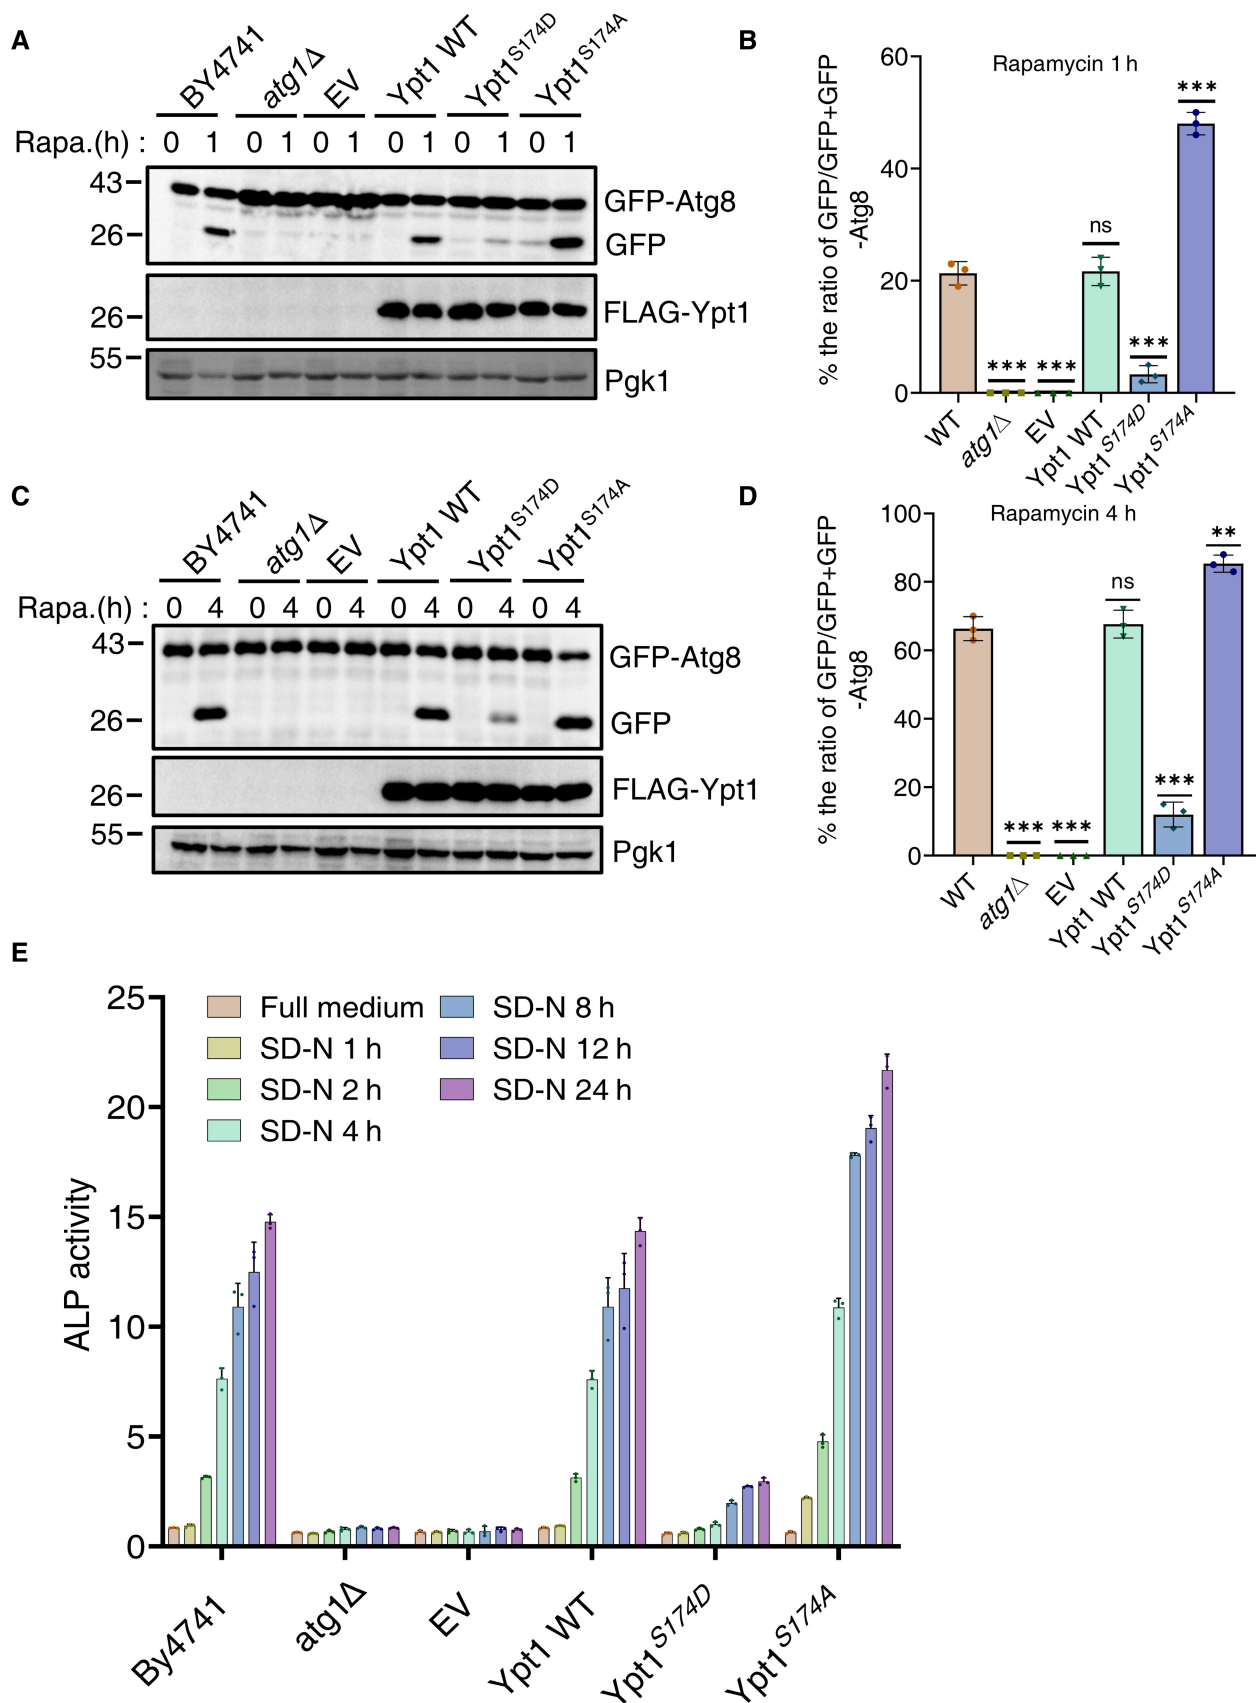

Figure EV4.



**Figure EV5. (corresponding to Fig 8). The phosphorylation of Ypt1 by TOR negatively regulates the PAS recruitment of Hrr25.**

- A, B The protein samples from Fig 8D (A) and G (B) were analysis by western-blot using the corresponding antibody. Pgk1 served as a loading control.
- C *atg1Δ* yeast cells expressing empty vector, wild-type FLAG-Atg1 (WT), or FLAG-Atg1<sup>T226</sup> plasmids were grown to the early log phase, and then subjected to SD-N for 0 or 1 h. Cell lysates were immunoprecipitated with anti-FLAG agarose beads and then the phosphorylation level of Atg1 T226 was detected using an anti-phospho-Atg1 antibody.
- D The phosphorylation level of Atg1 T226 from Fig 8J were quantified by calculating the ratio of p-Atg1-T226/FLAG-Atg1 ( $n = 3$ ). Data are presented as mean  $\pm$  SD. \*\*\* $P < 0.001$ ; \*\* $P < 0.01$ ; \* $P < 0.05$ ; two-tailed Student's *t*-tests were used.
- E AID-3×HA-Ypt1 yeast cells co-expressing Atg17-2×mCherry and Hrr25-GFP were transformed into empty vector, HA-Ypt1 WT, S174A, or S174D plasmids, these yeast strains were grown to log phase and then subjected to nitrogen starvation for 1 h. Images were obtained by fluorescence microscopy. Scale bar: 2  $\mu$ m.
- F Cells from (E) were quantified for the number of cells with puncta that were double-positive for Hrr25 and Atg17.  $n = 300$  cells were pooled from three independent experiments. Data are presented as mean  $\pm$  SD. \*\*\* $P < 0.001$ ; \* $P < 0.05$ ; two-tailed Student's *t*-tests were used.
- G The protein samples from (E) were analysis by western-blot using the corresponding antibody. Pgk1 served as a loading control.
- H AID-3×HA-Ypt1 yeast cells co-expressing HA-Ypt1, HA-Ypt1<sup>S174A</sup> or HA-Ypt1<sup>S174D</sup> and Hrr25-3×FLAG were grown to log phase and then subjected to nitrogen starvation for 0 or 1 h. Cell lysates were immunoprecipitated with anti-FLAG agarose beads and then analyzed by western blot using an anti-HA antibody.

Source data are available online for this figure.

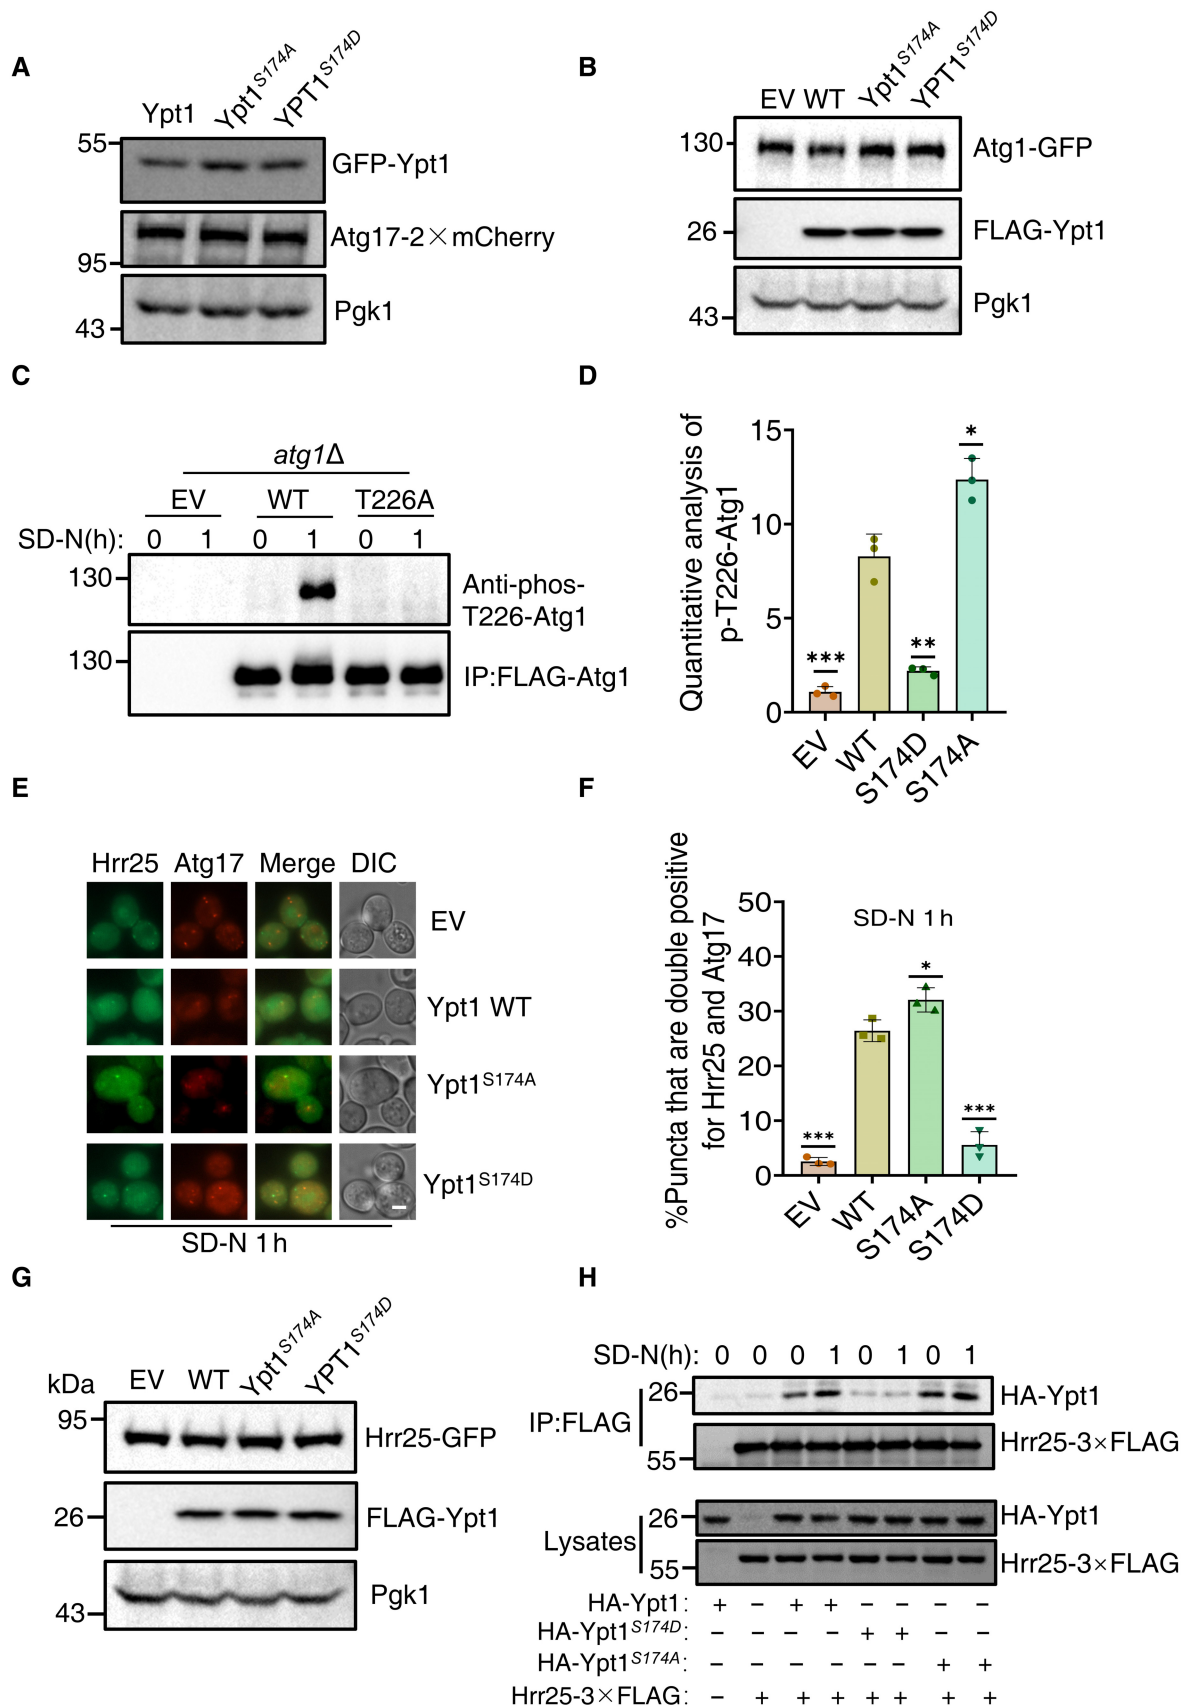

Figure EV5.
